# Supplementary material for: Trends of intramolecular hydrogen bonding in substituted alcohols: a deeper investigation
Source: Royal Society of Chemistry journal article supplement (doi:10.1039/c7cp03572a), 2017-01-01
Supplement: c7cp03572a1.pdf [file c7cp03572a1.pdf]

**Electronic Supplementary Information**

**Trends of intramolecular hydrogen bonding in substituted  
alcohols: A deeper investigation**

Lucas J. Karas,<sup>ab</sup> Patrick R. Batista,<sup>a</sup> Renan V. Viesser,<sup>b</sup> Cláudio F. Tormena,<sup>b</sup> Roberto Rittner,<sup>b</sup> and Paulo R. de Oliveira<sup>a\*</sup>

*<sup>a</sup>Conformational Analysis and Renewable Resources Laboratory, Department of Chemistry and Biology, Federal University of Technology - Paraná, P.O. Box 5000, 81280-340, Curitiba, PR, Brazil*

*<sup>b</sup>Physical Organic Chemistry Laboratory, Institute of Chemistry, University of Campinas, P. O. Box 6154, 13083-970 Campinas, SP, Brazil*

*\* E-mail: poliveira@utfpr.edu.br*

## Experimental Details

**Preparation of 3-ethoxypropan-1-ol (3).** 5 g of propane-1,3-diol (**1**) (66 mmol) and 60 mL of dry THF were placed in a 125 mL two-neck round-bottomed flask, fitted with a calcium chloride protected reflux condenser, a dropping funnel, and a magnetic stirrer. 1.6 g (67 mmol) of sodium hydride was added and the reaction mixture was stirred in an ice bath at 0° C for 1 h. Next, 10.4 g (67 mmol) of ethyl iodide in 15 mL of dry THF was gradually added. The ice bath was removed and stirring was continued for another 1 h, under reflux. The solution was cooled to 20° C and water was gradually added to the reaction flask. The organic layer was separated with diethyl ether, dried over MgSO<sub>4</sub> and filtered, and the solvent was evaporated. The crude product was purified by column chromatography, using 3:1 hexane:ethyl acetate as eluent and 230-400 mesh silica gel providing 2.05g of **3** (41% yield).

<sup>1</sup>H NMR (600 MHz, CD<sub>3</sub>CN): δ (ppm) 3.55 (td, 6.19 Hz, 5.42 2H); 3.47 (t, 6.31 Hz, 2H); 3.43 (q, 7.03 Hz, 2H); 2.65 (t, 5.42 Hz, 1H); 1.69 (quint, 6.27 Hz, 2 H); 1.13 (t, 7.03 Hz, 3 H). <sup>13</sup>C NMR (150 MHz, CD<sub>3</sub>CN): δ (ppm) 68.75; 66.79; 60.40; 33.67; 15.63 (Fig. S1).

**Preparation of 3-isopropoxypropan-1-ol (4).** The compound was obtained via the same procedure described for **3**, replacing ethyl iodide by isopropyl iodide and yielding 400 mg (8%) of **4**.

<sup>1</sup>H NMR (600 MHz, CDCl<sub>3</sub>): δ (ppm) 3.77 (t, 5.52 Hz, 2 H); 3.62 (t, 5.73 Hz, 2 H); 3.58 (sept, 6.10 Hz, 1 H); 1.81 (quint, 5.59 Hz, 2 H); 1.16 (d, 6.12 Hz, 6H). <sup>13</sup>C NMR (150 MHz, CDCl<sub>3</sub>): δ (ppm) 72.02; 67.81; 62.64; 32.15; 22.05 (Fig. S3).

**Preparation of 3-*tert*-butoxypropan-1-ol (5).** 6 g of **1** (78.8 mmol), 9 mL of *tert*-butyl chloride (81.4 mmol) and 12 mL of pyridine were placed in a two-neck 125 mL round-bottom flask, fitted with reflux condenser, and a magnetic stirrer. The mixture was stirred overnight under reflux. Water was added to the reaction flask after. The organic layer was separated with diethyl ether, dried over MgSO<sub>4</sub>, filtered and the solvent was evaporated. The crude product was purified by column chromatography, using 3:1 hexane:ethyl acetate as eluent and 230-400 mesh silica gel providing 720 mg of **5** (12% of yield).

<sup>1</sup>H NMR (600 MHz, CDCl<sub>3</sub>): δ (ppm) 3.76 (dd, 5.40 Hz, 2 H); 3.58 (dd, 5.64 Hz, 2 H); 1.79 (quint, 5.52 Hz, 2 H); 1.20 (s, 9 H). <sup>13</sup>C NMR (150 MHz, CDCl<sub>3</sub>): δ (ppm) 73.49; 63.14; 61.90; 32.45; 27.62(Fig. S3).

**Preparation of 3-methylbutane-1,3-diol (8).** 5 g of 3-methylbut-3-en-1-ol (58 mmol) and 50 mL of concentrated hydrochloric acid were placed in a 125 mL two-neck round-bottom flask, fitted with a reflux condenser, and a magnetic stirrer. The reaction mixture was stirred for 2 hours. After, water was added to the reaction flask. The organic layer was separated with diethyl ether, dried over MgSO<sub>4</sub> and filtered, and the solvent was evaporated. The crude product was purified by column chromatography, using 3:1 hexane:ethyl acetate as eluent and 230-400 mesh silica gel providing 2.35 g (47% yield).

<sup>1</sup>H NMR (600 MHz, CDCl<sub>3</sub>): δ (ppm) 3.89 (t, 5.70 Hz, 2 H); 1.74 (t, 5.67 Hz, 2 H); 1.29 (s, 6 H). <sup>13</sup>C NMR (150 MHz, CDCl<sub>3</sub>): δ (ppm) 72.17; 60.33; 43.57; 29.84. (Fig. S3).

**Preparation of 3-methyl-3-methoxybutan-1-ol (9).** The compound was obtained via the same procedure described for **8**. However, it was added 5 mL of methanol to the reaction mixture yielding 2 g (40%) of **9**.

**<sup>1</sup>H NMR** (600 MHz, CDCl<sub>3</sub>): δ (ppm) 3.78 (t, 5.82 Hz, 2 H); 3.29 (s, 3 H); 1.75 (t, 5.82 Hz, 2 H); 1.22 (s, 6 H). **<sup>13</sup>C NMR** (150 MHz, CDCl<sub>3</sub>): δ (ppm) 76.41; 59.90; 49.30; 42.48; 24.67. (Fig. S3).

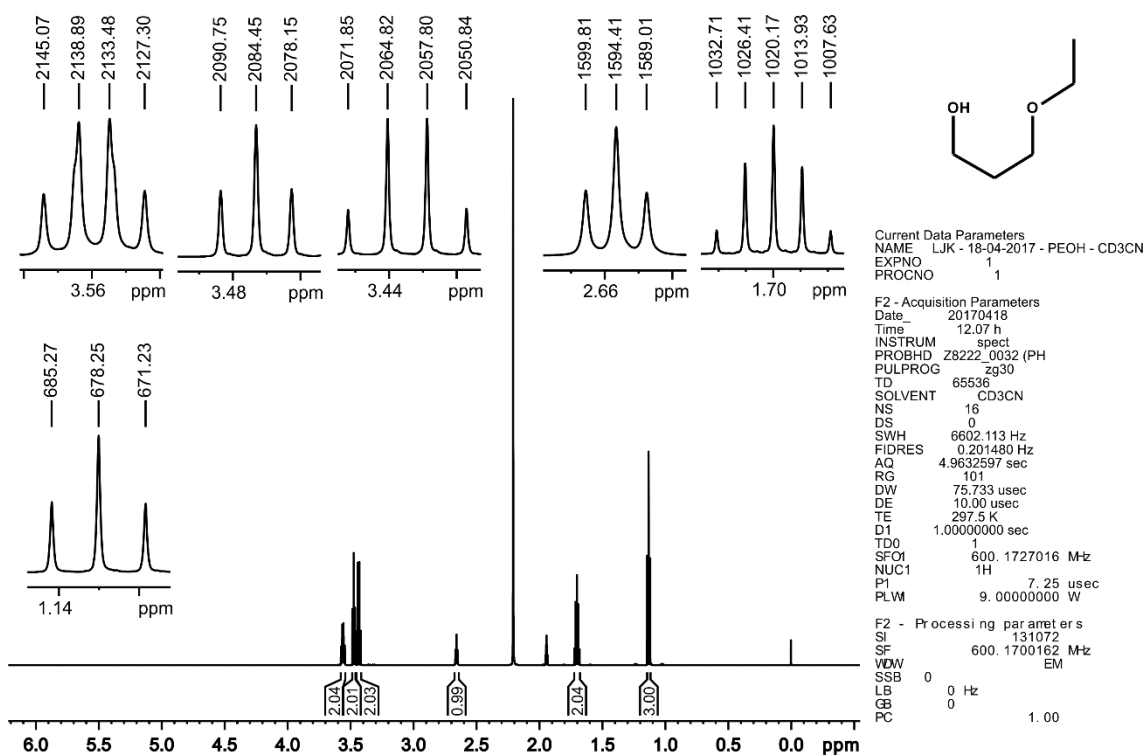

**Fig. S1.**  $^1\text{H}$  NMR spectrum of 3-ethoxypropan-1-ol in  $\text{CD}_3\text{CN}$  acquired at 600 MHz for  $^1\text{H}$ .

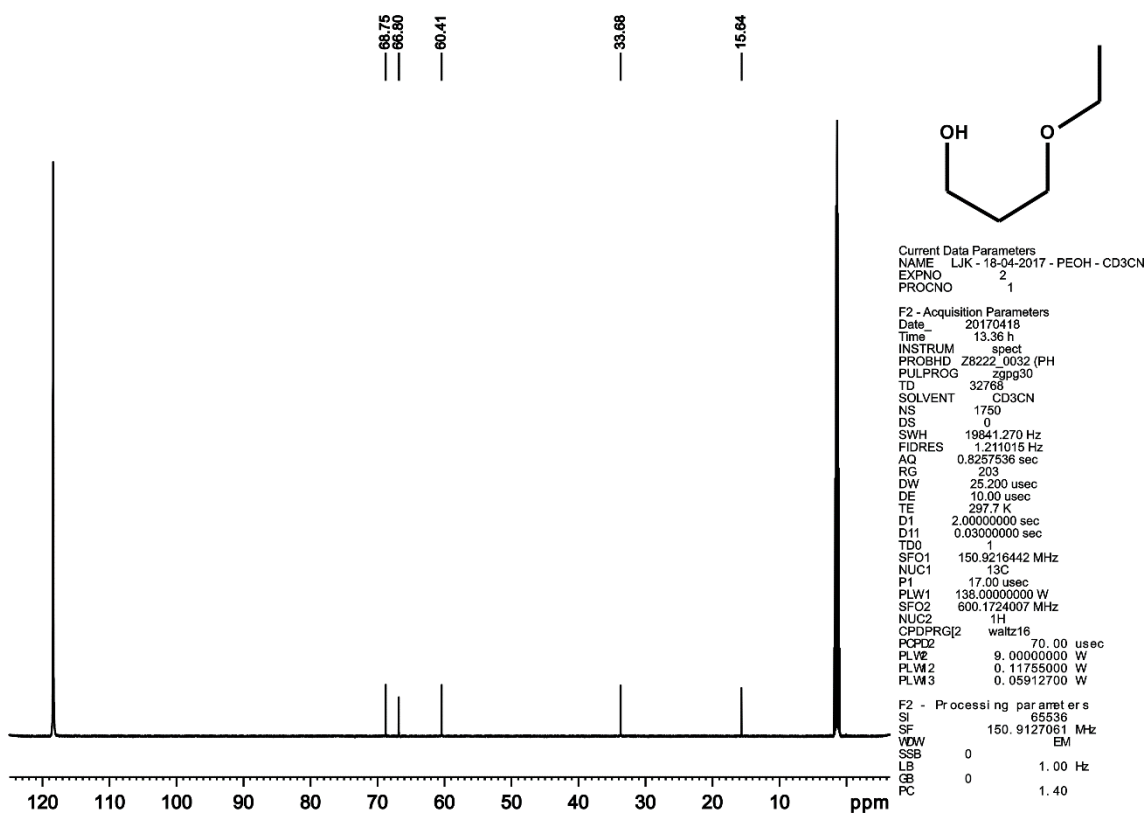

**Fig. S2.**  $^{13}\text{C}$  NMR spectrum of 3-ethoxypropan-1-ol in  $\text{CD}_3\text{CN}$  acquired at 150 MHz for  $^{13}\text{C}$ .

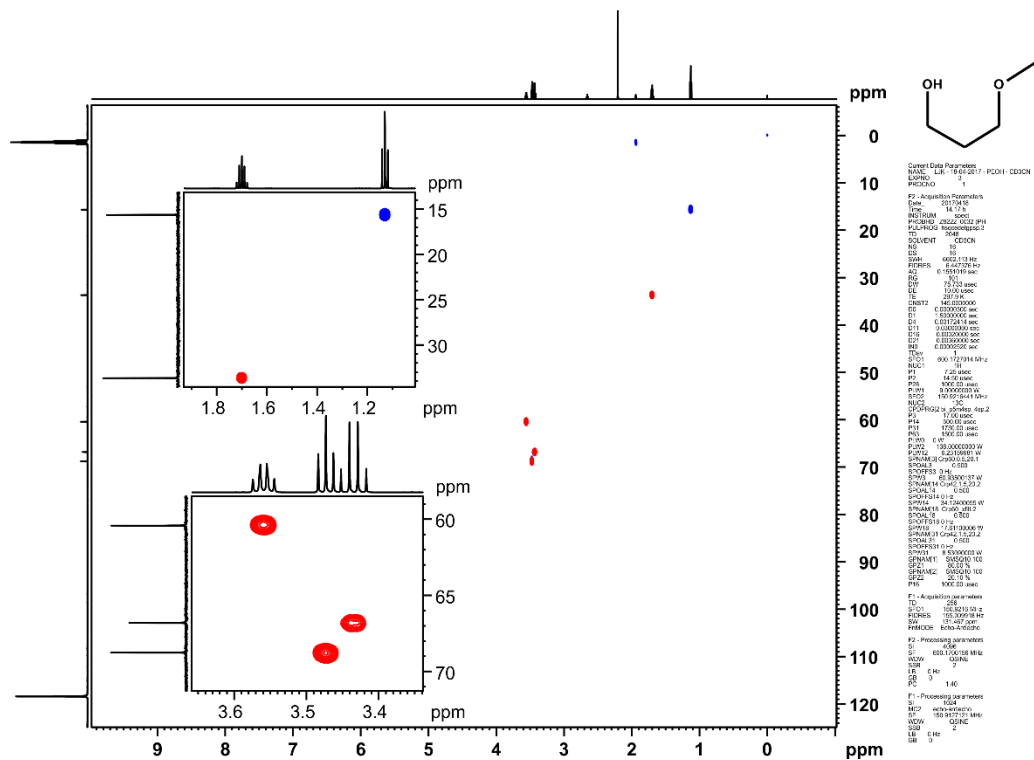

**Fig. S3.** HSQC contour plot of 3-ethoxypropan-1-ol in CD<sub>3</sub>CN (red cross peaks represent CH<sub>2</sub> and blue cross peaks represent CH or CH<sub>3</sub>).

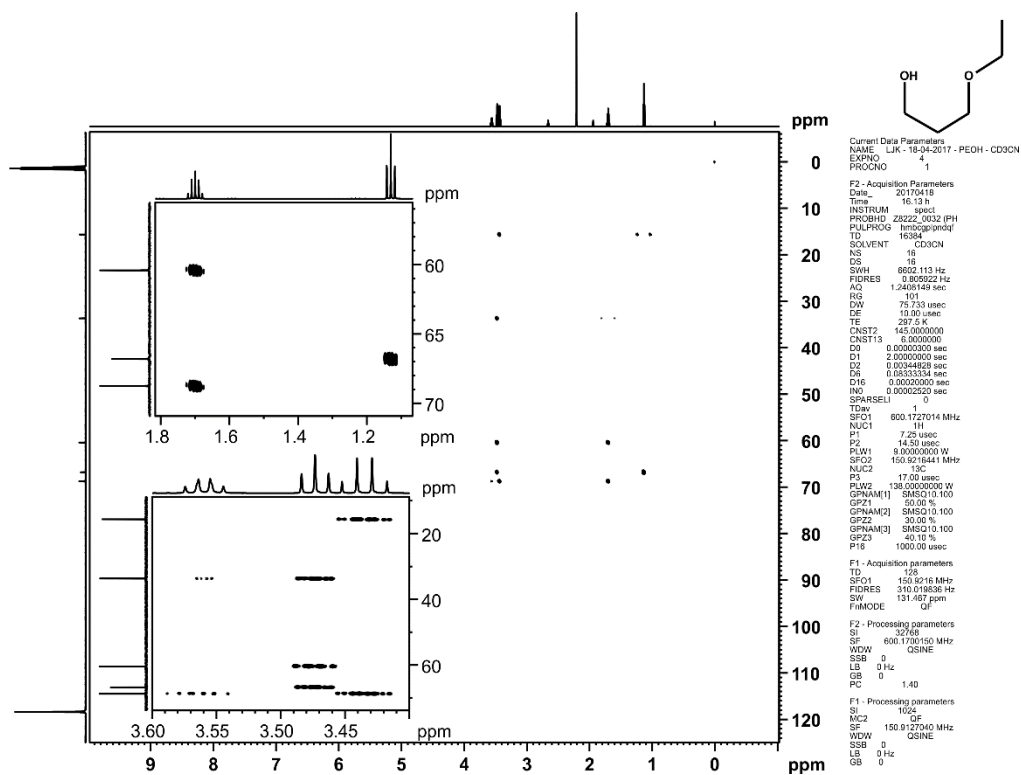

**Fig. S4.** HMBC contour plot of 3-ethoxypropan-1-ol in CD<sub>3</sub>CN.

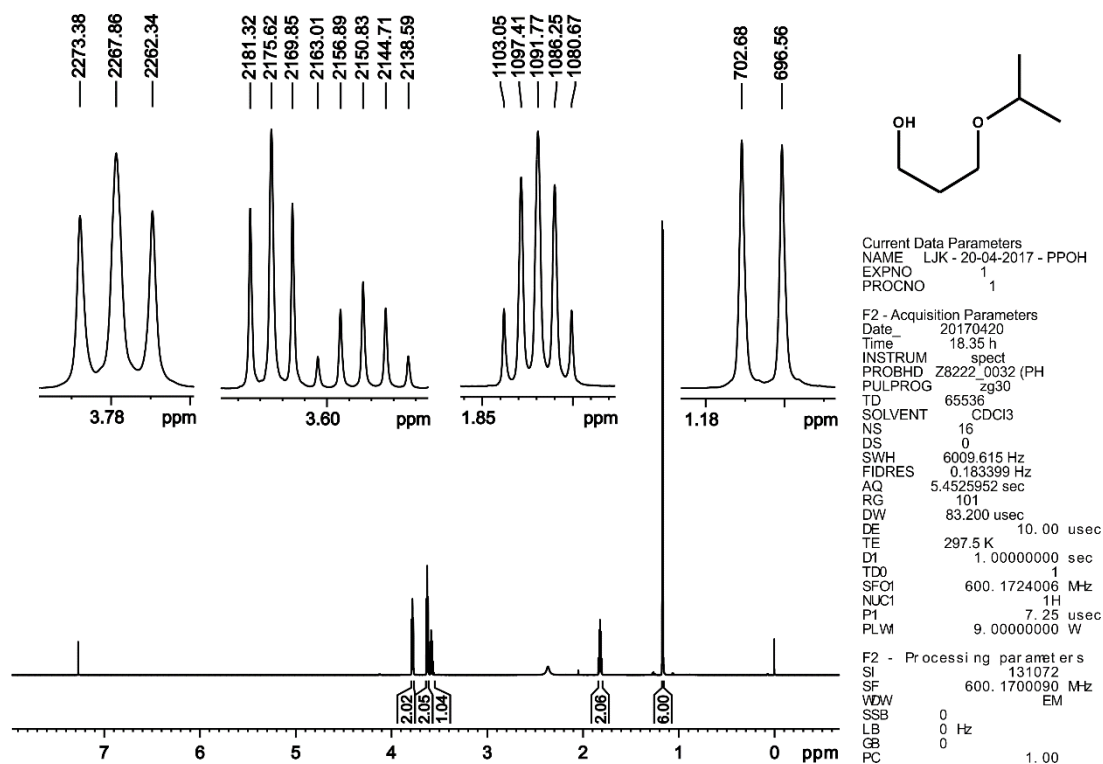

**Fig. S5.**  $^1\text{H}$  NMR spectrum of 3-isopropoxypropan-1-ol in  $\text{CDCl}_3$  acquired at 600 MHz for  $^1\text{H}$ .

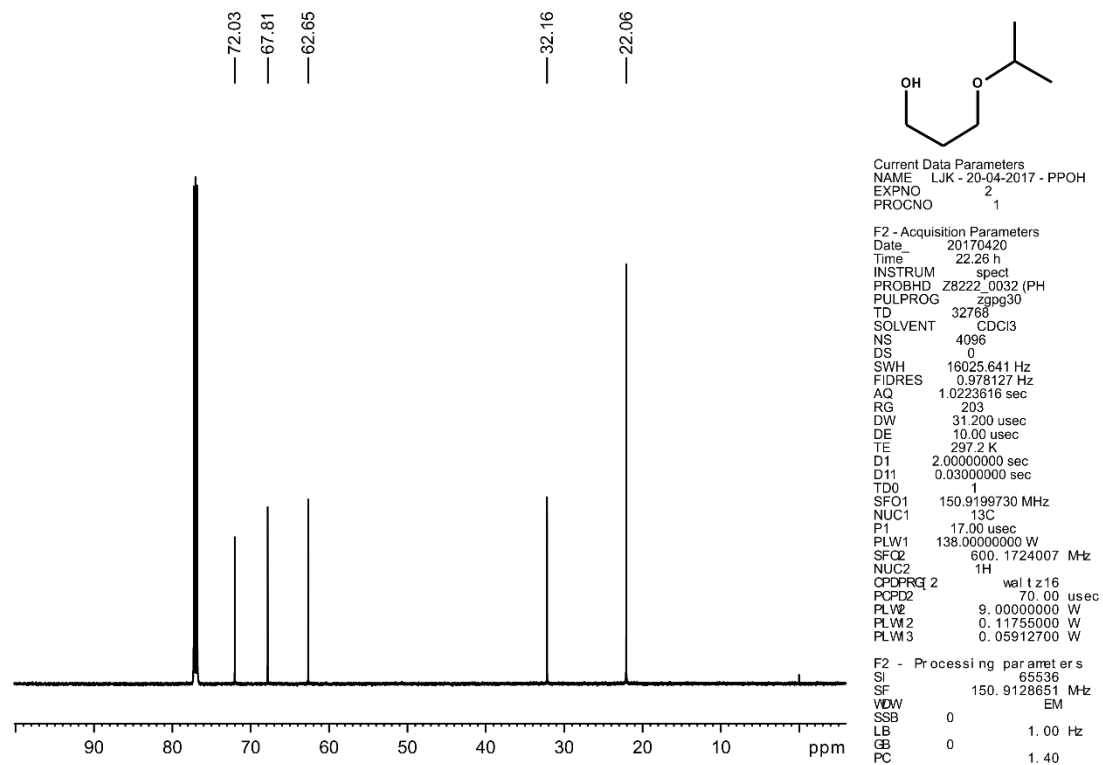

**Fig. S6.**  $^{13}\text{C}$  NMR spectrum of 3-isopropoxypropan-1-ol in  $\text{CDCl}_3$  acquired at 150 MHz for  $^{13}\text{C}$ .

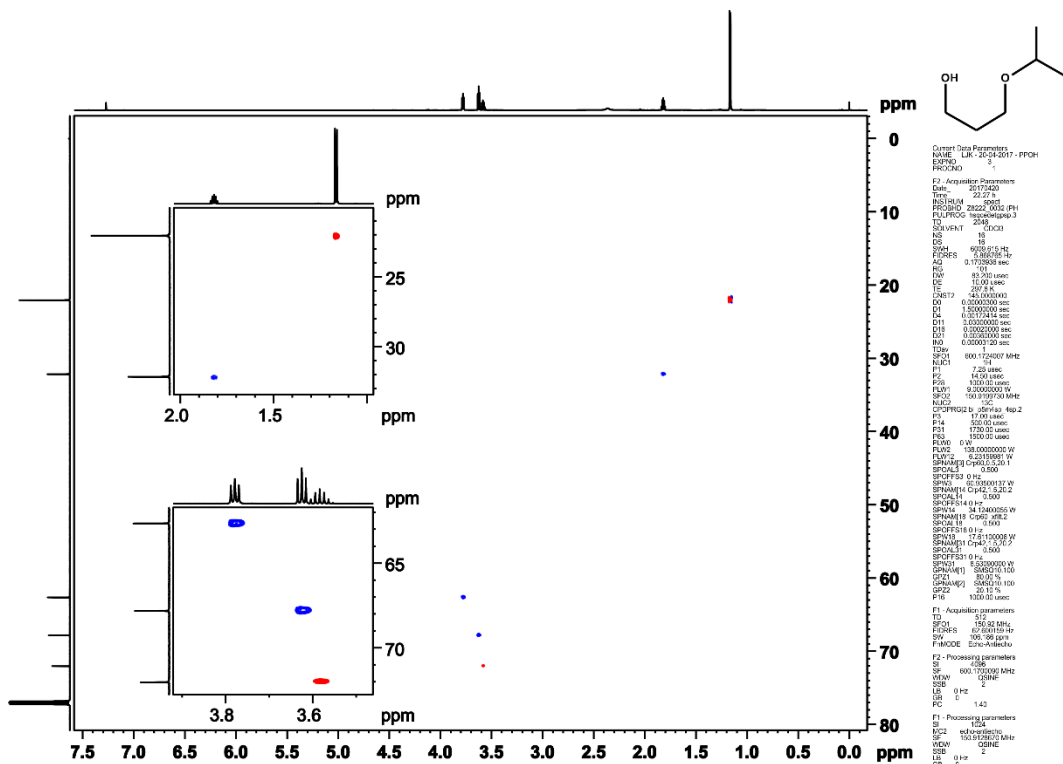

Fig. S7. HSQC contour plot of 3-isopropoxypropan-1-ol in  $\text{CDCl}_3$  (red cross peaks represent  $\text{CH}_2$  and blue cross peaks represent  $\text{CH}$  or  $\text{CH}_3$ ).

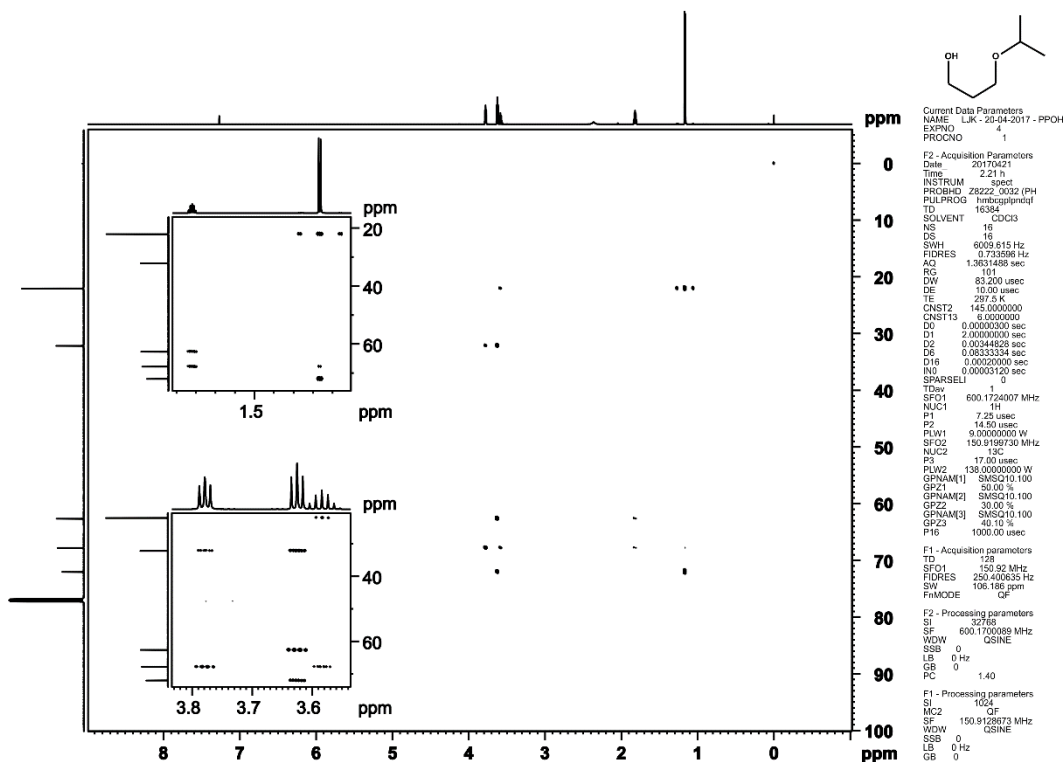

Fig. S8. HMBC contour plot of 3-isopropoxypropan-1-ol in  $\text{CDCl}_3$ .



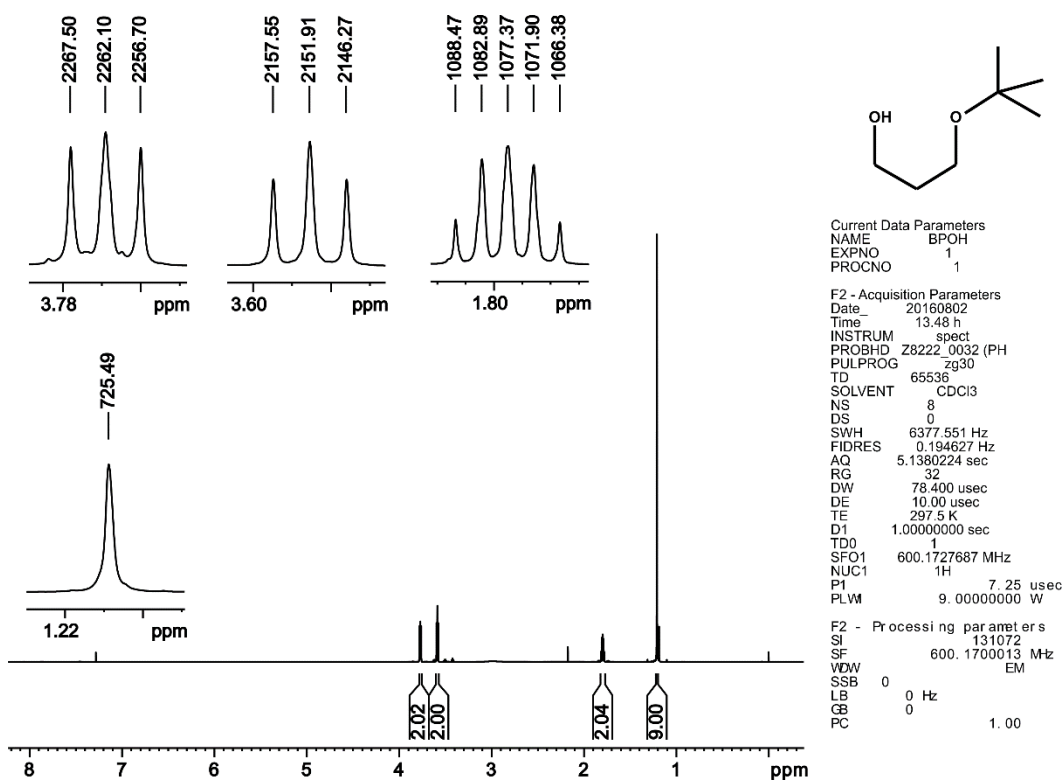

**Fig. S9.**  $^1\text{H}$  NMR spectrum of 3-*tert*-butoxypropan-1-ol in  $\text{CDCl}_3$  acquired at 600 MHz for  $^1\text{H}$ .

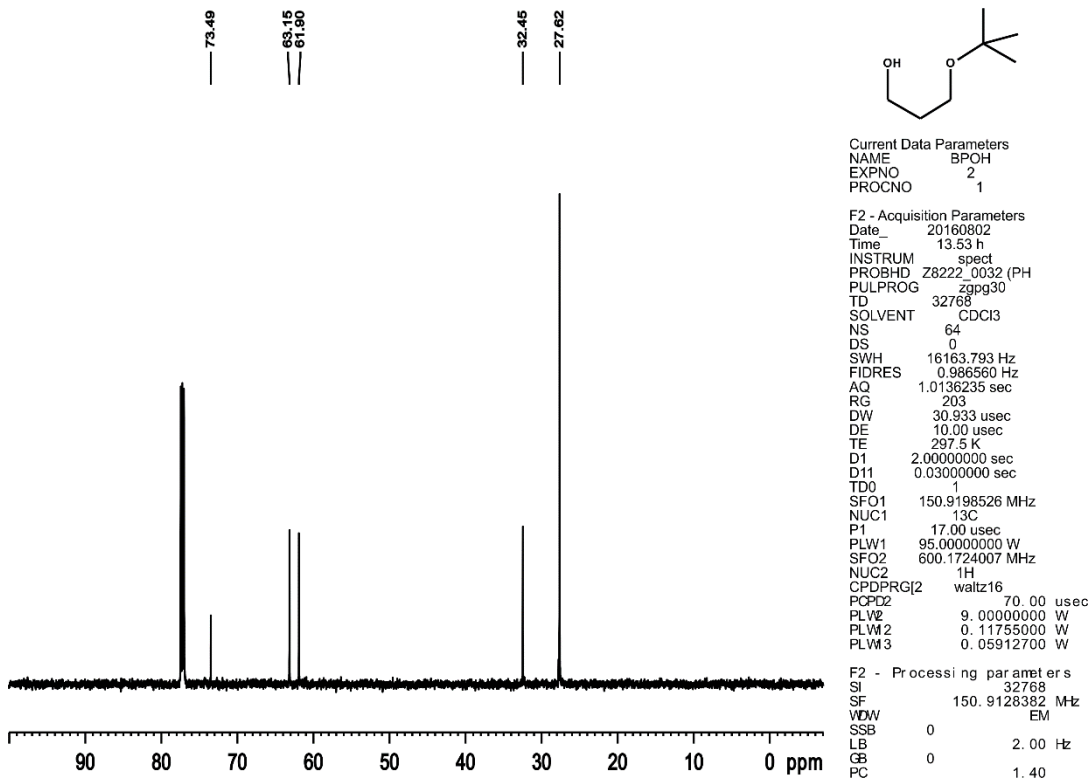

**Fig. S10.**  $^{13}\text{C}$  NMR spectrum of 3-*tert*-butoxypropan-1-ol in  $\text{CDCl}_3$  acquired at 150 MHz for  $^{13}\text{C}$ .



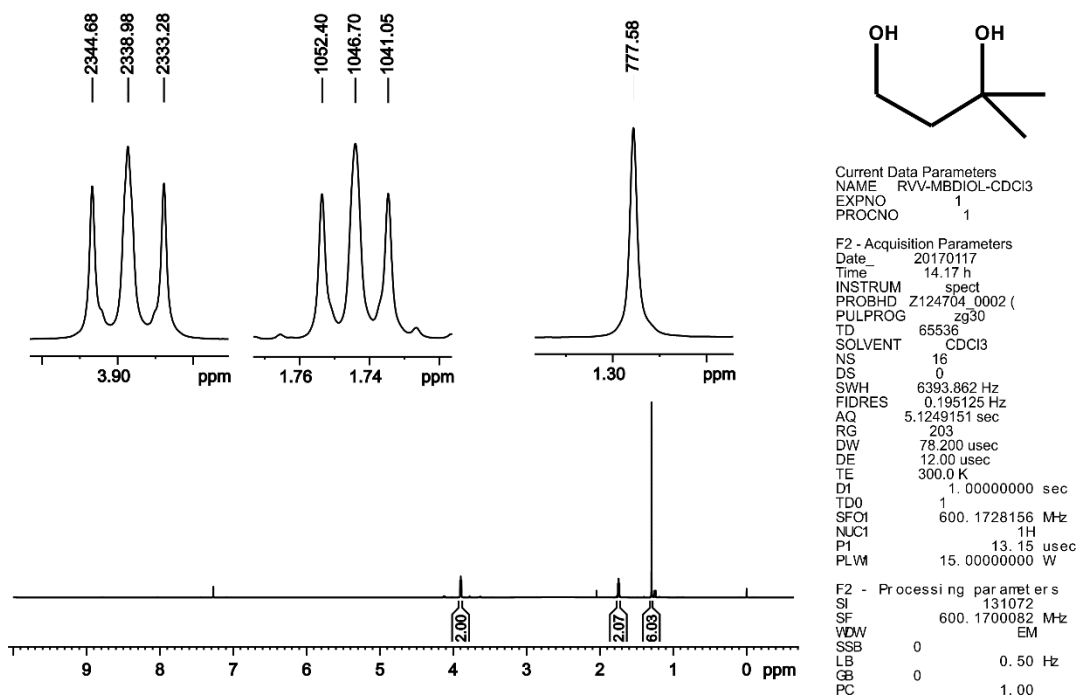

**Fig. S13.**  $^1\text{H}$  NMR spectrum of 3-methylbutane-1,3-diol in  $\text{CDCl}_3$  acquired at 600 MHz for  $^1\text{H}$ .

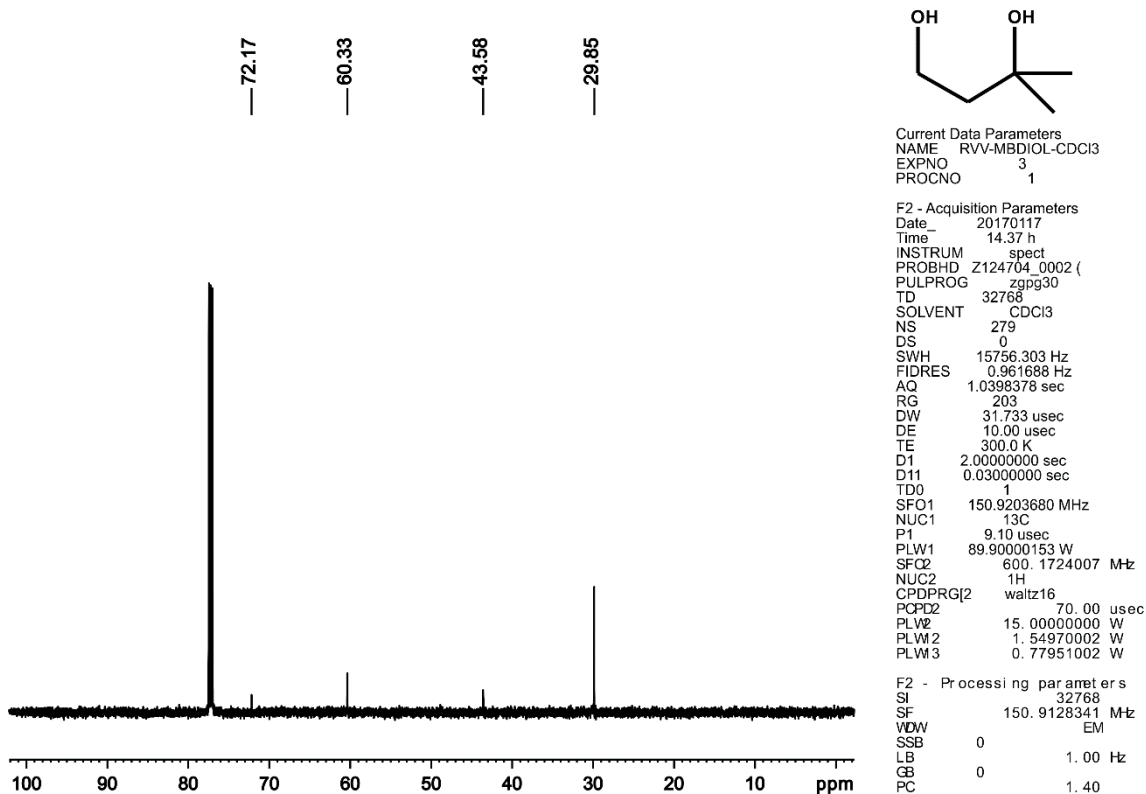

**Fig. S14.**  $^{13}\text{C}$  NMR spectrum of 3-methylbutane-1,3-diol in  $\text{CDCl}_3$  acquired at 150 MHz for  $^{13}\text{C}$ .

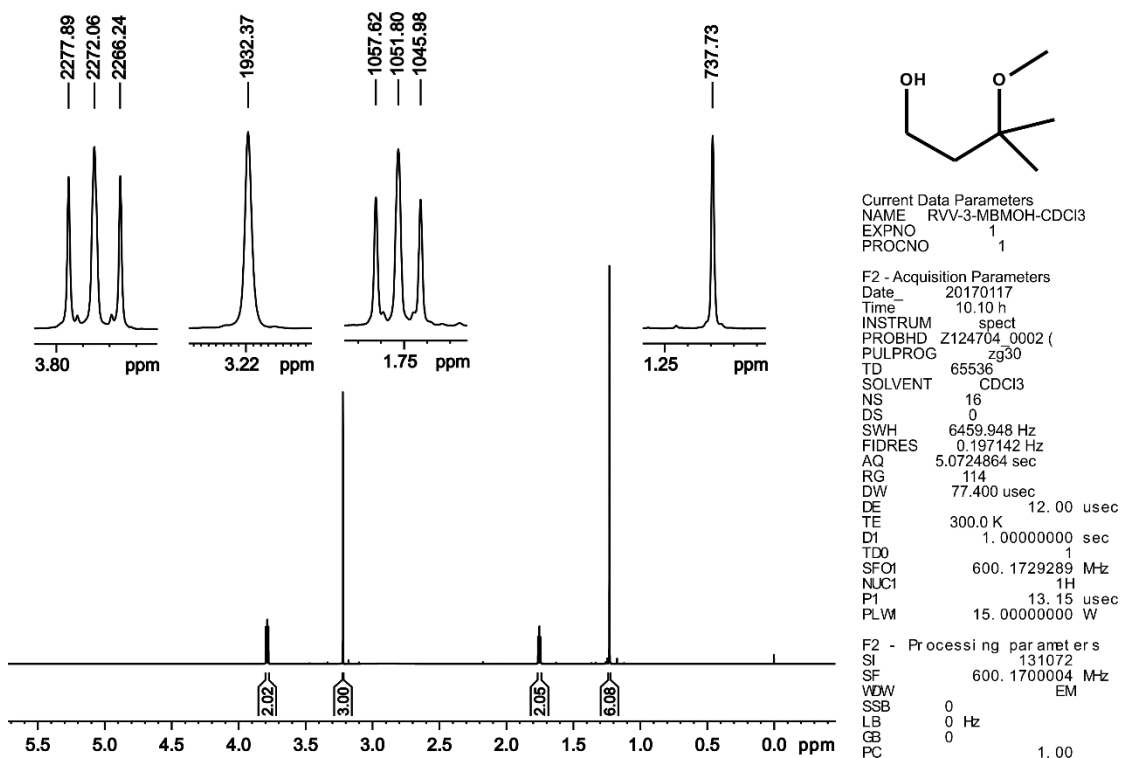

**Fig. S15.**  $^1\text{H}$  NMR spectrum of 3-methyl-3-methoxybutan-1-ol in  $\text{CDCl}_3$  acquired at 600 MHz for  $^1\text{H}$ .

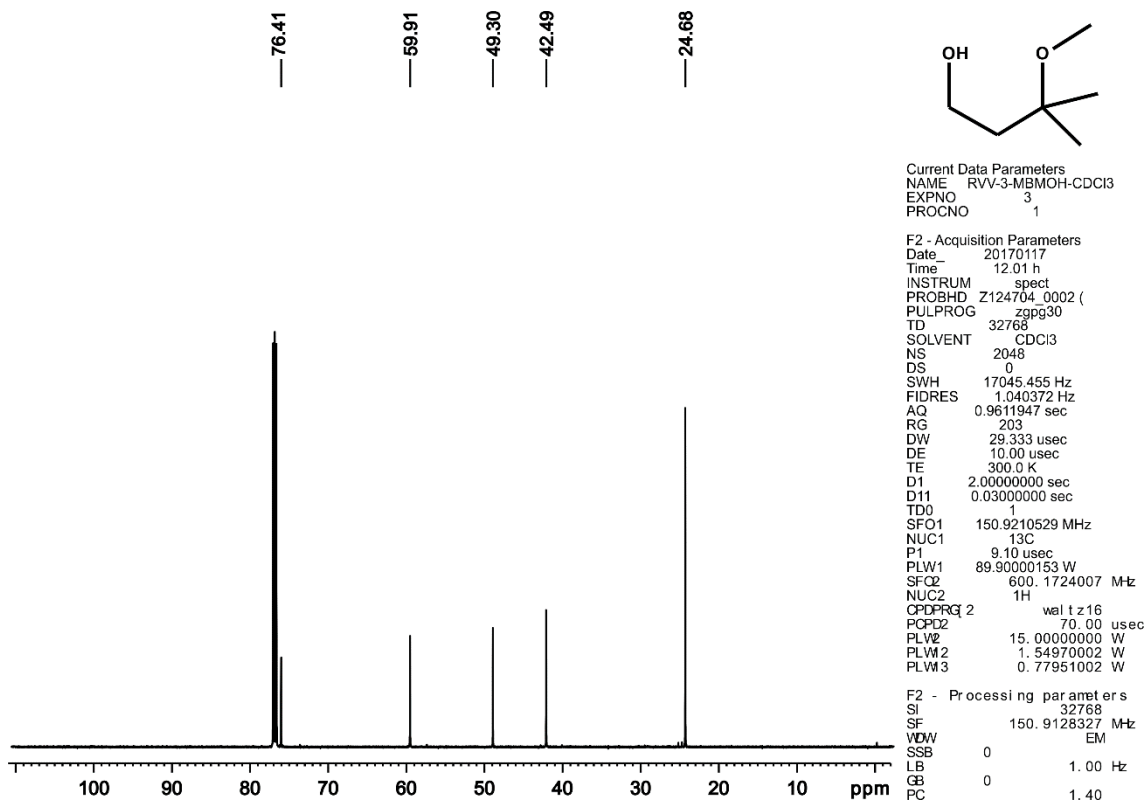

**Fig. S16.**  $^{13}\text{C}$  NMR spectrum of 3-methyl-3-methoxybutan-1-ol in  $\text{CDCl}_3$  acquired at 150 MHz for  $^{13}\text{C}$ .

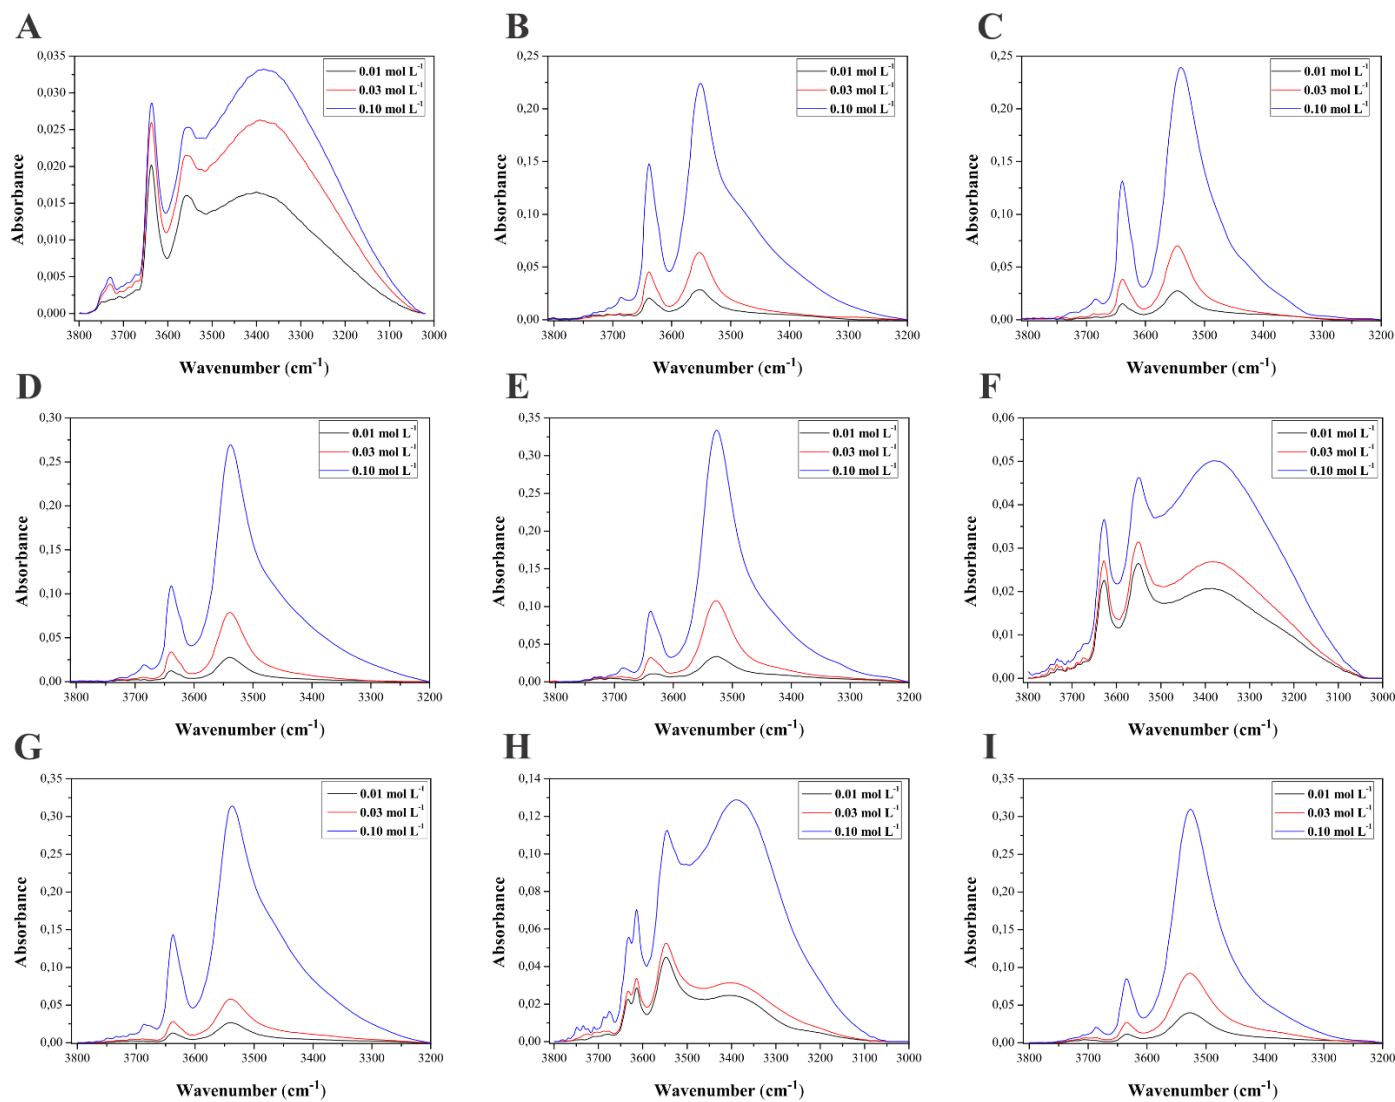

**Fig. S17.** Infrared spectra of **1** (A), **2** (B), **3** (C), **4** (D), **5** (E), **6** (F), **7** (G), **8** (H), and **9** (I) in  $\text{CCl}_4$  solution: 0.01, 0.03, and 0.10 mol  $\text{L}^{-1}$ .

Table S1. Relative Gibbs energy ( $\Delta G^a$ ) and thermal population (P)<sup>b</sup> for the most stable conformers of compounds **1-5** at 298 K.

| <b>1</b>        |              |       | <b>2</b>        |              |       | <b>3</b>        |              |       | <b>4</b>        |              |       | <b>5</b>        |              |       |
|-----------------|--------------|-------|-----------------|--------------|-------|-----------------|--------------|-------|-----------------|--------------|-------|-----------------|--------------|-------|
| Conformer       | $\Delta G^a$ | $P^b$ |
| 1a <sup>c</sup> | 0,00         | 43    | 2a <sup>c</sup> | 0,00         | 61    | 3a <sup>c</sup> | 0,00         | 54    | 4a <sup>c</sup> | 0,00         | 66    | 5a <sup>c</sup> | 0,00         | 77    |
| 1b <sup>c</sup> | 0,40         | 22    | 2b              | 0,99         | 11    | 3b              | 1,11         | 8     | 4b              | 1,15         | 10    | 5b <sup>c</sup> | 0,79         | 20    |
| 1c              | 0,67         | 14    | 2c              | 1,39         | 6     | 3c <sup>c</sup> | 1,11         | 8     | 4c              | 1,37         | 7     | 5c              | 1,74         | 3     |
| 1d              | 1,33         | 5     | 2d <sup>c</sup> | 1,54         | 5     | 3d <sup>c</sup> | 1,25         | 6     | 4d              | 1,64         | 4     |                 |              |       |
| 1e              | 1,34         | 4     | 2e              | 1,60         | 4     | 3e <sup>c</sup> | 1,43         | 5     | 4e              | 1,81         | 3     |                 |              |       |
| 1f              | 1,47         | 4     | 2f              | 1,62         | 4     | 3f              | 1,46         | 5     | 4f <sup>c</sup> | 1,88         | 3     |                 |              |       |
| 1g              | 1,49         | 3     | 2g              | 1,71         | 3     | 3g              | 1,68         | 3     | 4g              | 1,92         | 3     |                 |              |       |
| 1h              | 1,61         | 3     | 2h              | 1,75         | 3     | 3h              | 1,69         | 3     | 4h              | 1,94         | 3     |                 |              |       |
| 1i              | 1,62         | 3     | 2i              | 1,81         | 3     | 3i              | 1,79         | 3     | 4i              | 1,96         | 2     |                 |              |       |
|                 |              |       |                 |              |       | 3j              | 1,82         | 3     |                 |              |       |                 |              |       |
|                 |              |       |                 |              |       | 3k              | 1,90         | 2     |                 |              |       |                 |              |       |

<sup>a</sup> In kcal mol<sup>-1</sup>. <sup>b</sup> In %. <sup>c</sup> Conformers hydrogen-bonded.

Table S2. Relative Gibbs energy ( $\Delta G$ )<sup>a</sup> and thermal population (P)<sup>b</sup> for the most stable conformers of compounds **6-9** at 298 K.

| <b>6</b>         |              |       | <b>7</b>         |              |       | <b>8</b>         |              |       | <b>9</b>         |              |       |
|------------------|--------------|-------|------------------|--------------|-------|------------------|--------------|-------|------------------|--------------|-------|
| <b>Conformer</b> | $\Delta G^a$ | $P^b$ |
| 6a <sup>c</sup>  | 0,00         | 29    | 7a <sup>c</sup>  | 0,00         | 57    | 8a <sup>c</sup>  | 0,00         | 47    | 9a <sup>c</sup>  | 0,00         | 90    |
| 6b <sup>c</sup>  | 0,16         | 22    | 7b <sup>c</sup>  | 0,93         | 12    | 8b <sup>c</sup>  | 0,51         | 20    | 9b <sup>c</sup>  | 1,37         | 9     |
| 6c <sup>c</sup>  | 0,50         | 12    | 7c               | 0,99         | 11    | 8c <sup>c</sup>  | 0,55         | 19    | 9c               | 2,44         | 1     |
| 6d <sup>c</sup>  | 0,51         | 12    | 7d <sup>c</sup>  | 1,25         | 7     | 8d <sup>c</sup>  | 0,78         | 13    |                  |              |       |
| 6e               | 1,09         | 5     | 7e               | 1,49         | 5     | 8e               | 2,08         | 1     |                  |              |       |
| 6f <sup>c</sup>  | 1,09         | 5     | 7f               | 1,76         | 3     |                  |              |       |                  |              |       |
| 6g <sup>c</sup>  | 1,54         | 2     | 7g               | 1,79         | 3     |                  |              |       |                  |              |       |
| 6h <sup>c</sup>  | 1,57         | 2     | 7h               | 1,88         | 2     |                  |              |       |                  |              |       |
| 6i <sup>c</sup>  | 1,64         | 2     |                  |              |       |                  |              |       |                  |              |       |
| 6j <sup>c</sup>  | 1,65         | 2     |                  |              |       |                  |              |       |                  |              |       |
| 6k               | 1,66         | 2     |                  |              |       |                  |              |       |                  |              |       |
| 6l <sup>c</sup>  | 1,78         | 1     |                  |              |       |                  |              |       |                  |              |       |
| 6m <sup>c</sup>  | 1,80         | 1     |                  |              |       |                  |              |       |                  |              |       |
| 6n <sup>c</sup>  | 1,83         | 1     |                  |              |       |                  |              |       |                  |              |       |
| 6o               | 1,92         | 1     |                  |              |       |                  |              |       |                  |              |       |

<sup>a</sup> In kcal mol<sup>-1</sup>. <sup>b</sup> In %. <sup>c</sup> Conformers hydrogen-bonded.



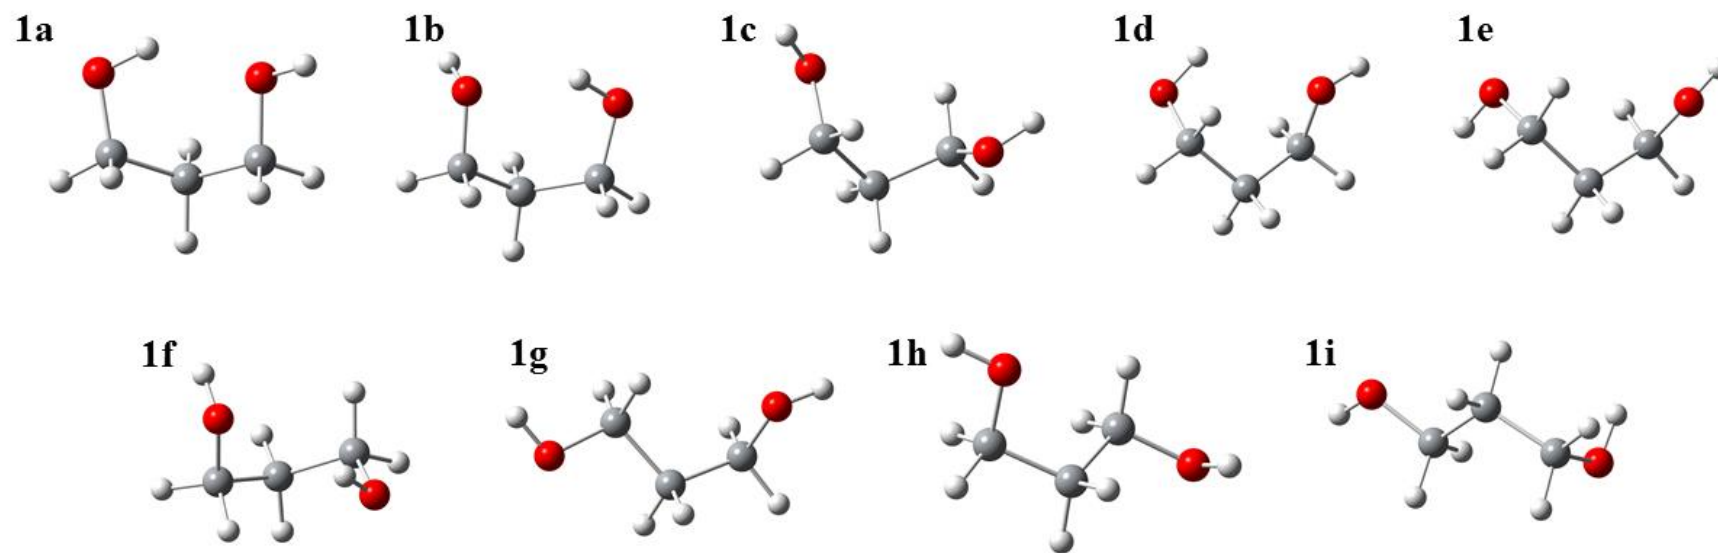

**Fig. S18.** Stable conformers for compound 1.

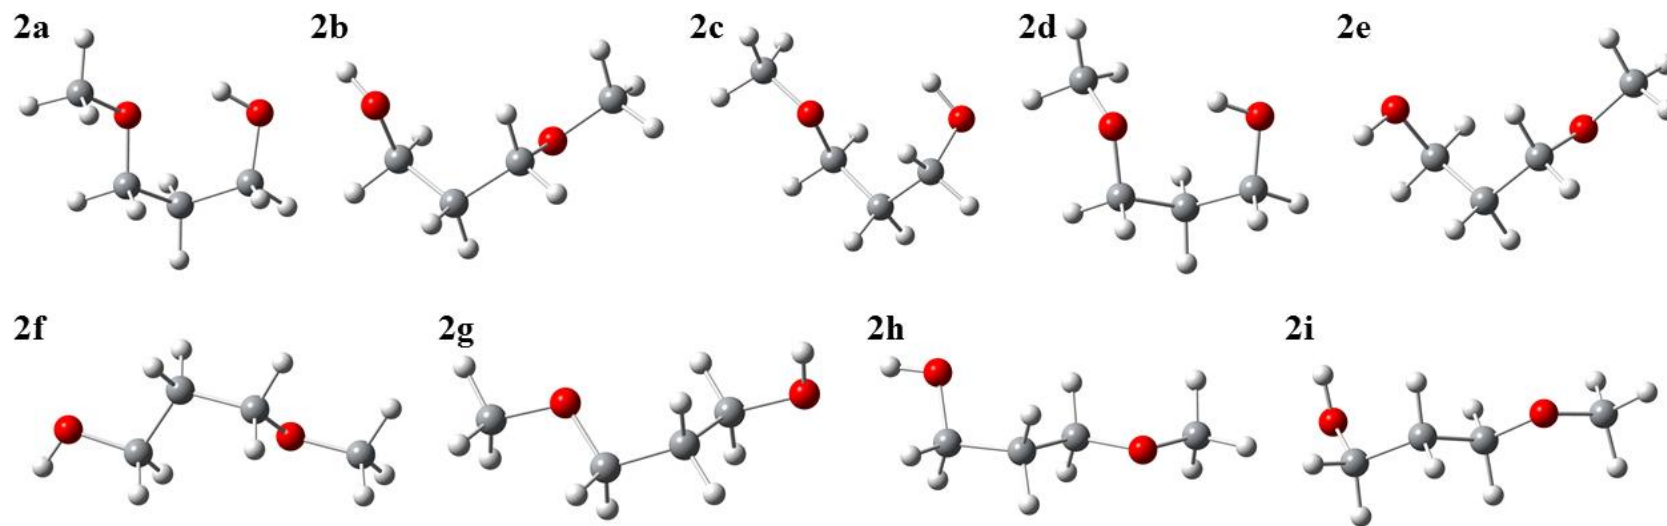

**Fig. S19.** Stable conformers for compound 2.

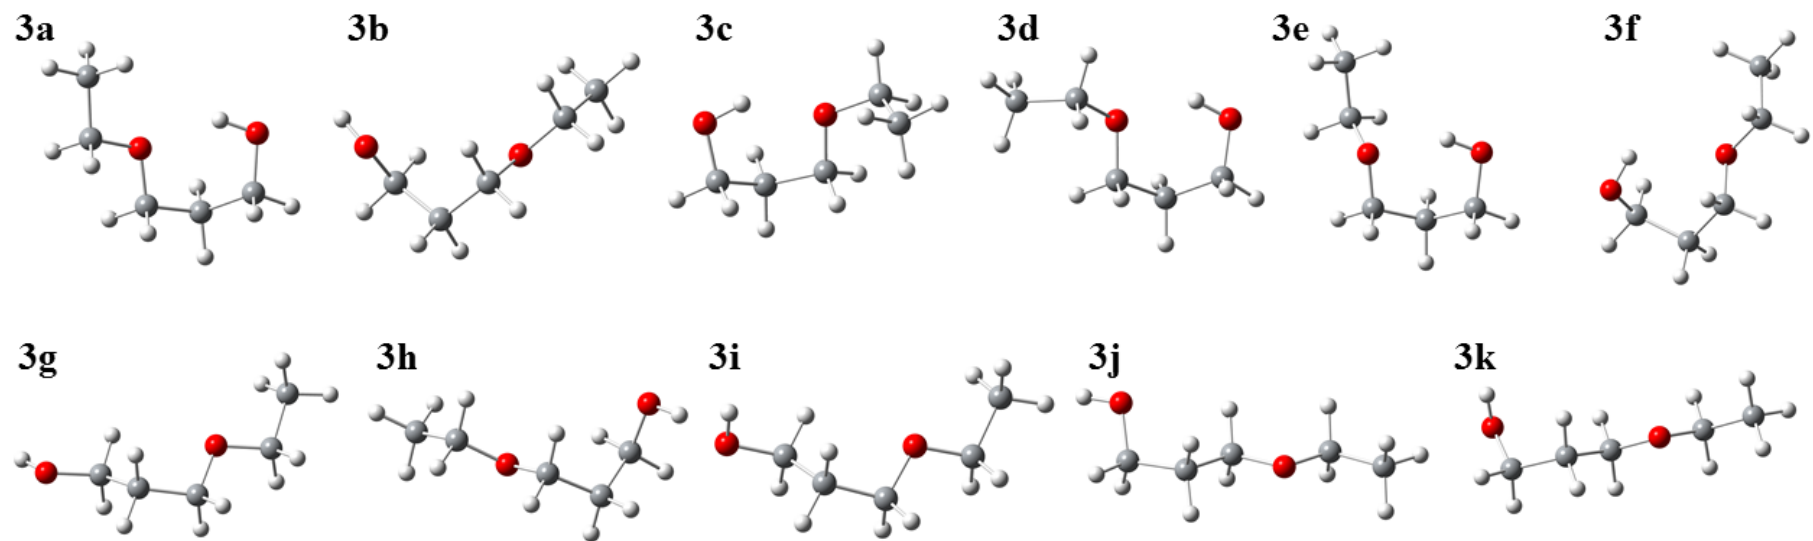

**Fig. S20.** Stable conformers for compound 3.

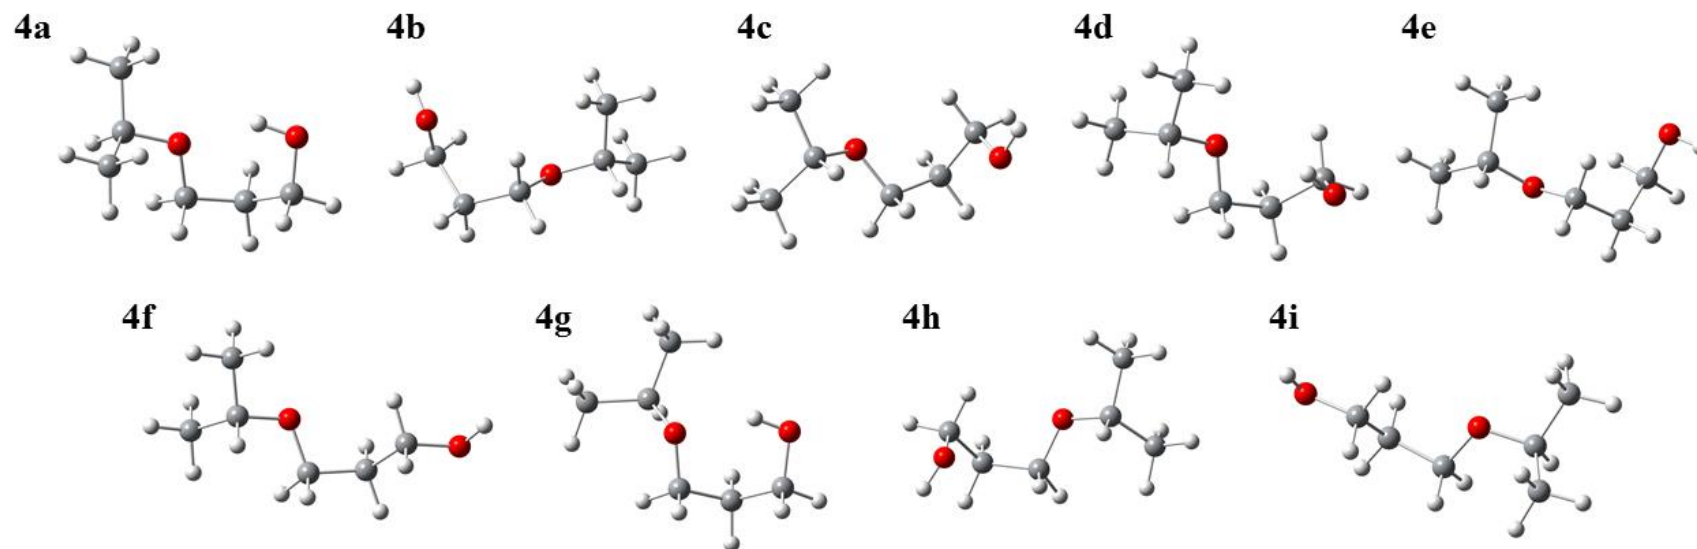

**Fig. S21.** Stable conformers for compound 4.

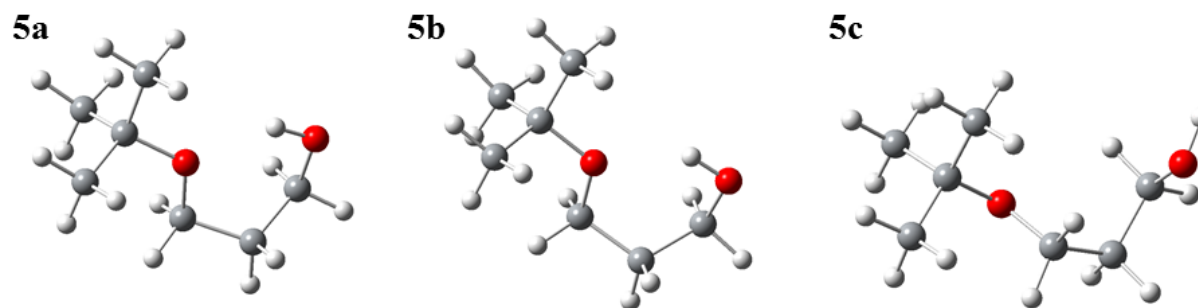

**Fig. S22.** Stable conformers for compound 5.

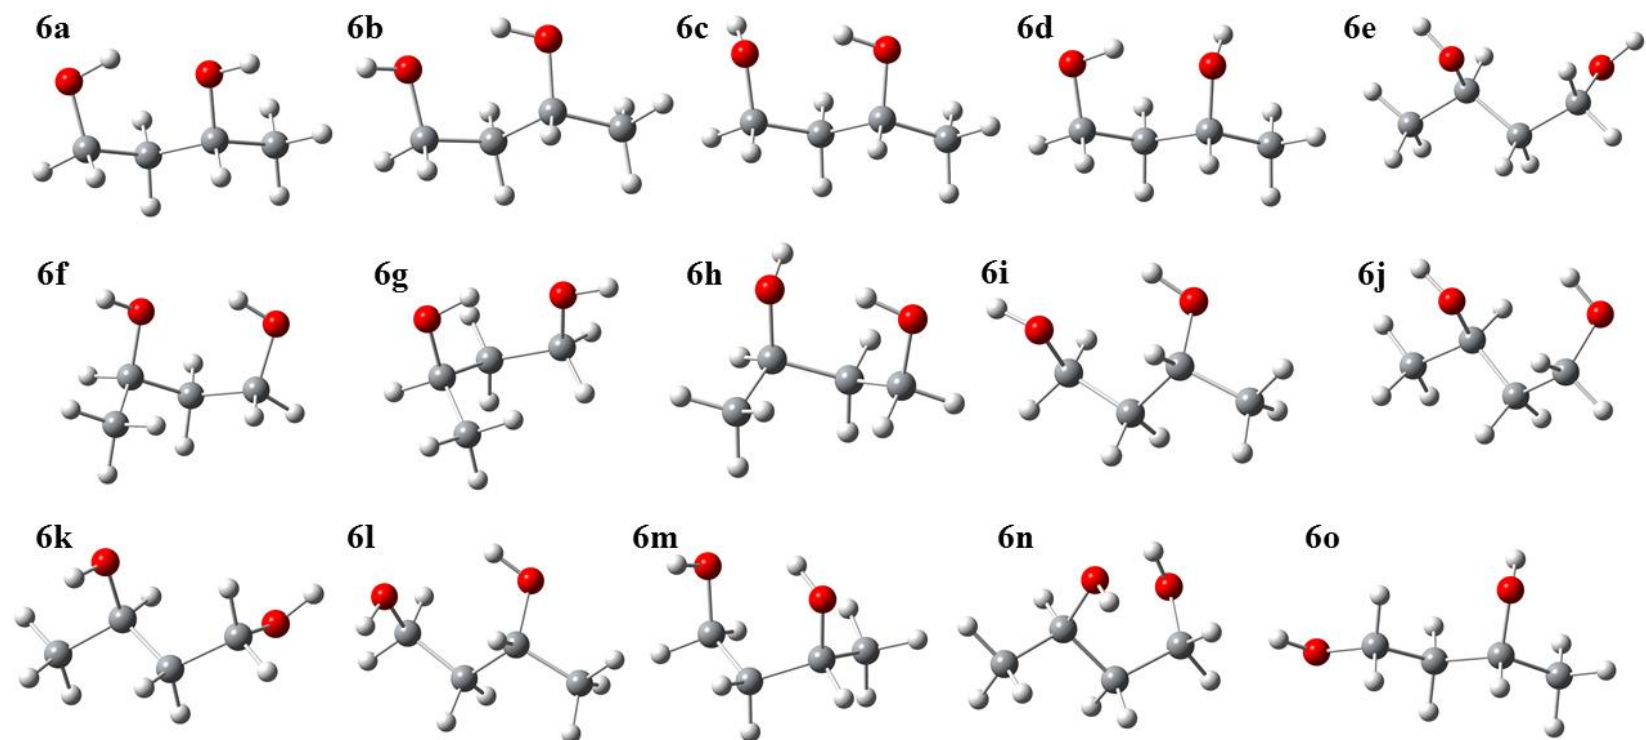

**Fig. S23.** Stable conformers for compound **6**.

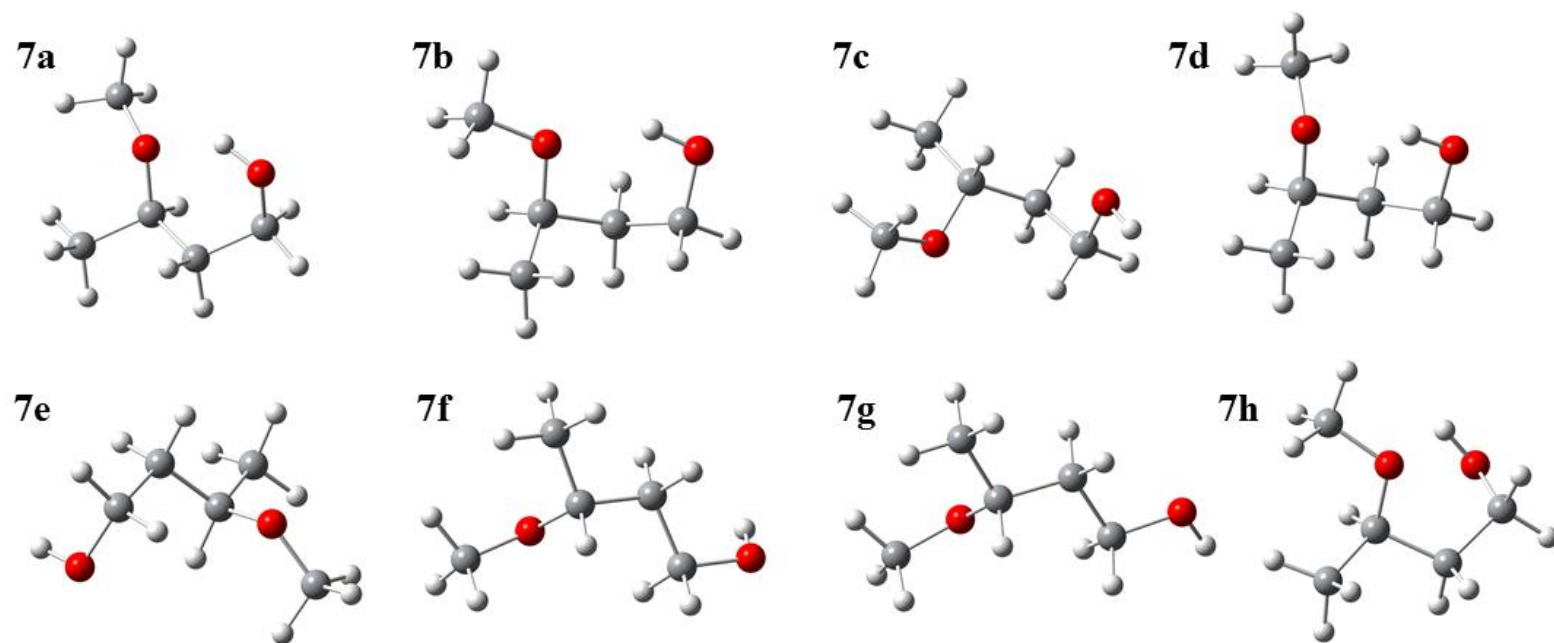

**Fig. S24.** Stable conformers for compound 7.

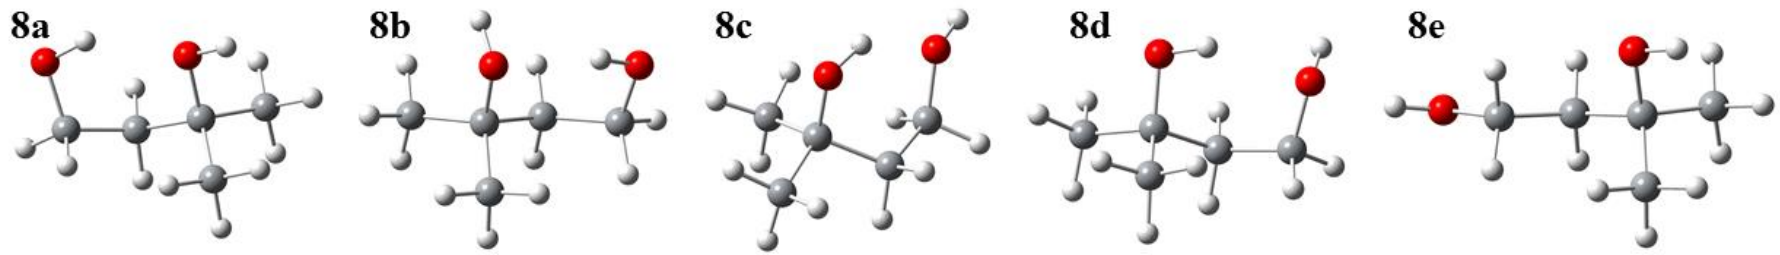

Fig. S25. Stable conformers for compound 8.

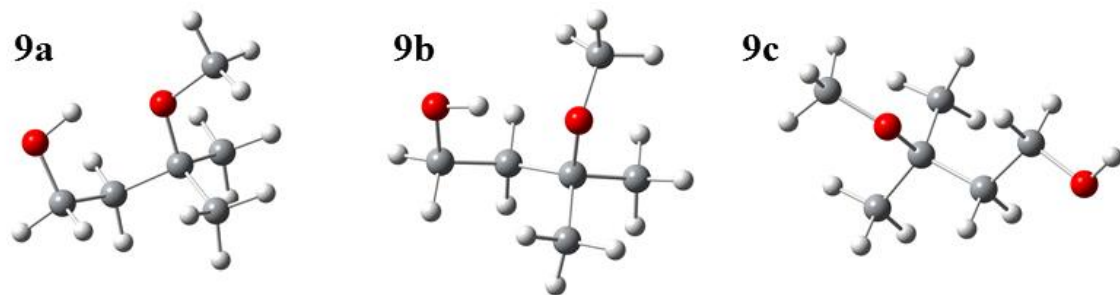

Fig. S26. Stable conformers for compound 9.

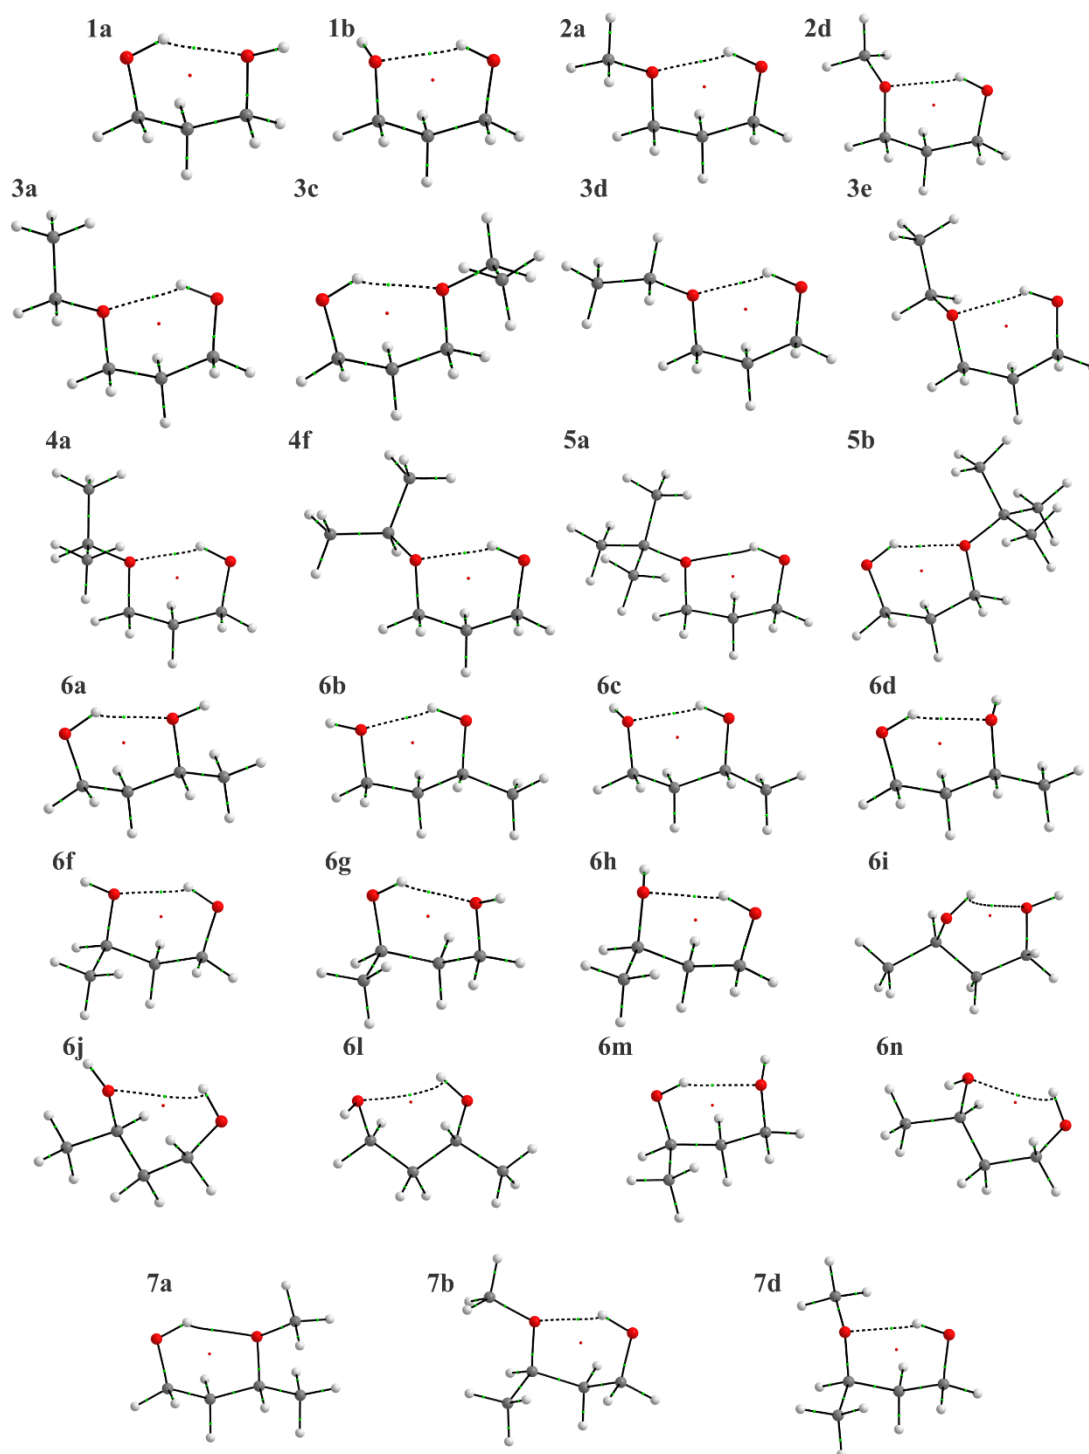

**Fig. S27.** QAIM molecular graphs for hydrogen-bonded conformers of compounds **1-7**. BCPs and RCPs are shown as green and red circles, respectively, and BPs are indicated by dotted lines.



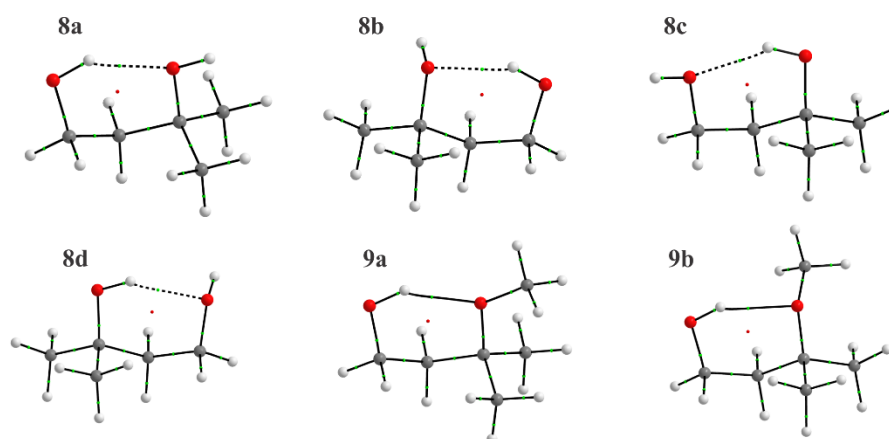

**Fig. S28.** QTAIM molecular graphs for hydrogen-bonded conformers of compounds **8-9**. BCPs and RCPs are shown as green and red circles, respectively, and BPs are indicated by dotted lines.

**Table S3.** QTAIM topological parameters obtained for hydrogen-bonded conformers at the hydrogen bond BCP and atomic properties of atoms H and O donor of IAHB calculated at the LC- $\omega$ PBE/6-311+G(d,p) level of theory.

| Conformer                                          | 1a      | 1b      | 2a      | 2d      | 3a      | 3c      | 3d      | 3e      | 4a      | 4f      | 5a      |
|----------------------------------------------------|---------|---------|---------|---------|---------|---------|---------|---------|---------|---------|---------|
| $\rho(\mathbf{r})_{\text{BCP}}^{\text{a}}$         | 0.0226  | 0.0219  | 0.0232  | 0.0229  | 0.0234  | 0.0238  | 0.0242  | 0.0237  | 0.0240  | 0.0247  | 0.0251  |
| $\nabla^2\rho(\mathbf{r})_{\text{BCP}}^{\text{a}}$ | 0.0879  | 0.0763  | 0.0889  | 0.0802  | 0.0896  | 0.0913  | 0.0914  | 0.0831  | 0.0920  | 0.0874  | 0.0950  |
| $\Delta R_{\text{H}}^{\text{a}}$                   | 0.8211  | 0.8174  | 0.8341  | 0.7984  | 0.8394  | 0.8488  | 0.8527  | 0.8205  | 0.8534  | 0.8503  | 0.8831  |
| $\Delta R_{\text{O}}^{\text{a}}$                   | 0.9524  | 0.2128  | 1.0158  | 0.0573  | 1.1087  | 0.0675  | 0.0672  | 0.0594  | 1.1311  | 0.0627  | 1.1594  |
| $\Delta q(\text{H})^{\text{a}}$                    | -0.0391 | -0.0321 | -0.0387 | -0.0321 | -0.0391 | -0.0402 | -0.0397 | -0.0331 | -0.0403 | -0.0369 | -0.0419 |
| $\Delta E(\text{H})^{\text{a}}$                    | -0.0214 | -0.0204 | -0.0232 | -0.0202 | -0.0238 | -0.0243 | -0.0240 | -0.0211 | -0.0247 | -0.0234 | -0.0257 |
| $\Delta M(\text{H})^{\text{a}}$                    | 0.0193  | 0.0233  | 0.0290  | 0.0243  | 0.0490  | 0.0298  | 0.0298  | 0.0251  | 0.0299  | 0.0277  | 0.0313  |
| $\Delta V(\text{H})^{\text{a}}$                    | 6.6710  | 5.8705  | 6.8043  | 6.1267  | 6.7692  | 7.0153  | 7.0103  | 6.0664  | 6.9115  | 7.0276  | 6.9504  |
| Conformer                                          | 5b      | 6a      | 6b      | 6c      | 6d      | 6f      | 6g      | 6h      | 6i      | 6j      | 6l      |
| $\rho(\mathbf{r})_{\text{BCP}}^{\text{a}}$         | 0.0248  | 0.0236  | 0.0242  | 0.0238  | 0.0236  | 0.0236  | 0.0225  | 0.0228  | 0.0116  | 0.0112  | 0.0215  |
| $\nabla^2\rho(\mathbf{r})_{\text{BCP}}^{\text{a}}$ | 0.0950  | 0.0921  | 0.0942  | 0.0841  | 0.0828  | 0.0925  | 0.0888  | 0.0801  | 0.0440  | 0.0430  | 0.0748  |
| $\Delta R_{\text{H}}^{\text{a}}$                   | 0.8775  | 0.8369  | 0.8810  | 0.8477  | 0.8115  | 0.8416  | 0.8426  | 0.7999  | 0.2068  | 0.0846  | 0.1341  |
| $\Delta R_{\text{O}}^{\text{a}}$                   | 0.0702  | 0.9720  | 0.9804  | 0.0602  | 0.9206  | 0.9736  | 0.9577  | 0.9062  | 0.6191  | 0.6049  | 0.6064  |
| $\Delta q(\text{H})^{\text{a}}$                    | -0.0423 | -0.0408 | -0.0447 | -0.0380 | -0.0380 | -0.0447 | -0.0414 | -0.0370 | -0.0150 | -0.0093 | -0.0200 |
| $\Delta E(\text{H})^{\text{a}}$                    | -0.0257 | -0.0243 | -0.0245 | -0.0226 | -0.0220 | -0.0246 | -0.0237 | -0.0217 | -0.0084 | -0.0075 | -0.0114 |
| $\Delta M(\text{H})^{\text{a}}$                    | 0.0314  | 0.0298  | 0.0335  | 0.0285  | 0.0252  | 0.0302  | 0.0309  | 0.0242  | 0.0115  | 0.0015  | 0.0143  |
| $\Delta V(\text{H})^{\text{a}}$                    | 7.0063  | 6.8653  | 7.6202  | 6.9355  | 6.2954  | 6.9516  | 7.1185  | 6.1707  | 2.7679  | 1.8257  | 3.0796  |

<sup>a</sup>In a.u.

**Table S3.** QTAIM topological parameters obtained for hydrogen-bonded conformers at the hydrogen bond BCP and atomic properties of atoms H and O donor of IAHB calculated at the LC- $\omega$ PBE/6-311+G(d,p) level of theory.

| <b>Conformer</b>                                   | <b>6m</b> | <b>6n</b> | <b>7a</b> | <b>7b</b> | <b>7d</b> | <b>8a</b> | <b>8b</b> | <b>8c</b> | <b>8d</b> | <b>9a</b> | <b>9b</b> |
|----------------------------------------------------|-----------|-----------|-----------|-----------|-----------|-----------|-----------|-----------|-----------|-----------|-----------|
| $\rho(\mathbf{r})_{\text{BCP}}^{\text{a}}$         | 0.0215    | 0.0114    | 0.0252    | 0.0246    | 0.0241    | 0.0245    | 0.0248    | 0.0238    | 0.0230    | 0.0268    | 0.0255    |
| $\nabla^2\rho(\mathbf{r})_{\text{BCP}}^{\text{a}}$ | 0.0748    | 0.0440    | 0.0947    | 0.0961    | 0.0850    | 0.0965    | 0.0873    | 0.0940    | 0.0805    | 0.1023    | 0.0894    |
| $\Delta\mathbf{R}_{\text{H}}^{\text{a}}$           | 0.7766    | 0.0588    | 0.9241    | 0.9291    | 0.8900    | 0.9276    | 0.8934    | 0.8632    | 0.8073    | 0.9123    | 0.8658    |
| $\Delta\mathbf{R}_{\text{O}}^{\text{a}}$           | 0.8793    | 0.6098    | 1.0447    | 1.0600    | 0.9975    | 0.9954    | 0.9411    | 0.9814    | 0.9100    | 1.0984    | 1.0382    |
| $\Delta\mathbf{q}(\text{H})^{\text{a}}$            | -0.0091   | -0.0204   | -0.0405   | -0.0429   | -0.0349   | -0.0449   | -0.0390   | -0.0461   | -0.0364   | -0.0463   | -0.0379   |
| $\Delta\mathbf{E}(\text{H})^{\text{a}}$            | -0.0053   | -0.0109   | -0.0243   | -0.0255   | -0.0219   | -0.0266   | -0.0247   | -0.0246   | -0.0206   | -0.0276   | -0.0238   |
| $\Delta\mathbf{M}(\text{H})^{\text{a}}$            | 0.0046    | 0.0118    | 0.0301    | 0.0317    | 0.0259    | 0.0320    | 0.0277    | 0.0356    | 0.0279    | 0.0337    | 0.0279    |
| $\Delta\mathbf{V}(\text{H})^{\text{a}}$            | 0.5579    | 2.5620    | 7.1139    | 7.3610    | 6.5675    | 7.2424    | 6.8292    | 7.8671    | 6.8307    | 7.7308    | 7.0041    |

<sup>a</sup> In a.u.

**Table S4.** Energy ( $\epsilon_i$ ) and s-character of LP<sub>1</sub>O orbital, atomic charge on the oxygen atom ( $q_O$ ), second-order perturbation energy of  $\sigma_{CH} \rightarrow \sigma_{CO}^*$  interaction, and bond angle between C-O-R atoms for prototype molecules that support the results obtained for the second group of compounds.

| Compound                  | $\epsilon_i$ (LP <sub>1</sub> O) <sup>a</sup> | s-character <sup>b</sup> | $q_O$ <sup>a</sup> | $\sigma_{CH} \rightarrow \sigma_{CO}^*$ <sup>c</sup> | $\angle$ C-O-R |
|---------------------------|-----------------------------------------------|--------------------------|--------------------|------------------------------------------------------|----------------|
| Methoxymethane            | -0,591                                        | 42                       | -0,583             | -                                                    | 112,2          |
| Methoxyethane             | -0,590                                        | 42                       | -0,594             | 6,94                                                 | 112,5          |
| 2-methoxypropane          | -0,581                                        | 41                       | -0,603             | 14,41                                                | 114,6          |
| 2-methoxy-2-methylpropane | -0,568                                        | 39                       | -0,616             | 22,72                                                | 117,4          |

<sup>a</sup> In au. <sup>b</sup> In %. <sup>c</sup> In kcal mol<sup>-1</sup>.
